# Supplementary material for: Selective deposition of cocatalyst NiS on a g-C3N4/ZnIn2S4 heterojunction for exceptional photocatalytic H2 evolution
Source: Royal Society of Chemistry journal article supplement (doi:10.1039/d2nj02545k), 2022-01-01
Supplement: d2nj02545k1.pdf [file d2nj02545k1.pdf]

## Selective deposition of cocatalyst NiS on g-C<sub>3</sub>N<sub>4</sub>/ZnIn<sub>2</sub>S<sub>4</sub> heterojunction for exceptional photocatalytic H<sub>2</sub> evolution

Yuzhou Xia,<sup>a,b</sup> Yunfeng He,<sup>a,b</sup> Xiyao Liu,<sup>a,b</sup> Renkun Huang,<sup>a,b</sup> Ruowen Liang,<sup>a,b</sup>

Feng Chen<sup>a,b</sup> and Guiyang Yan<sup>\*a,b</sup>

a: Fujian Province University Key Laboratory of Green Energy and Environment  
Catalysis, Ningde Normal University, Ningde, Fujian, 352100, P. R. China

b: Fujian Provincial Key Laboratory of Featured Materials in Biochemical Industry,  
Ningde Normal University, Ningde, Fujian, 352100, P. R. China

\*Corresponding author: Dr. Ruowen Liang (rwliang@ndnu.edu.cn); Prof. Guiyang  
Yan (ygyfjnu@163.com)

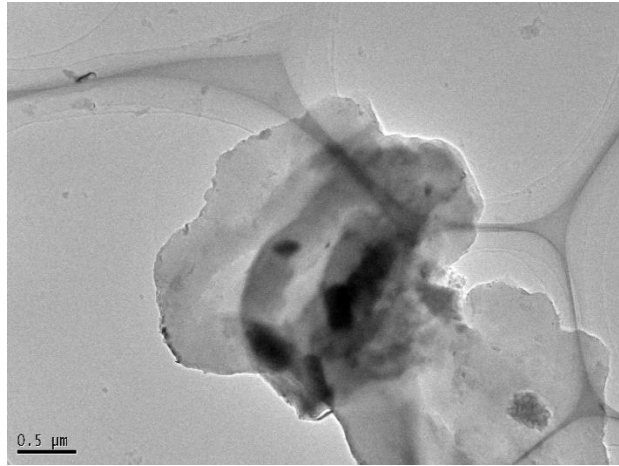

Figure. S1. TEM of g-C<sub>3</sub>N<sub>4</sub>.

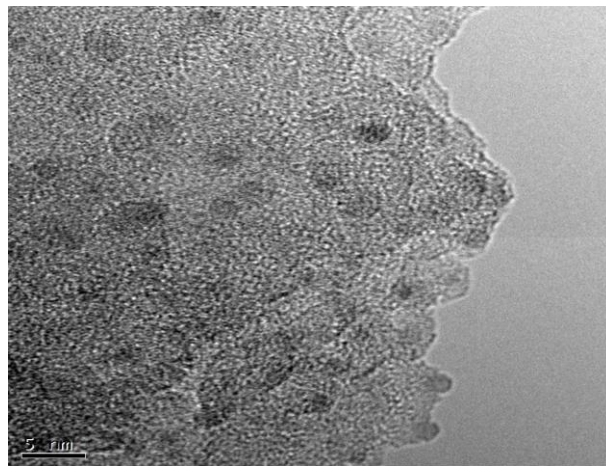

Figure S2. TEM of NiS-g-C<sub>3</sub>N<sub>4</sub>/ZnIn<sub>2</sub>S<sub>4</sub>.

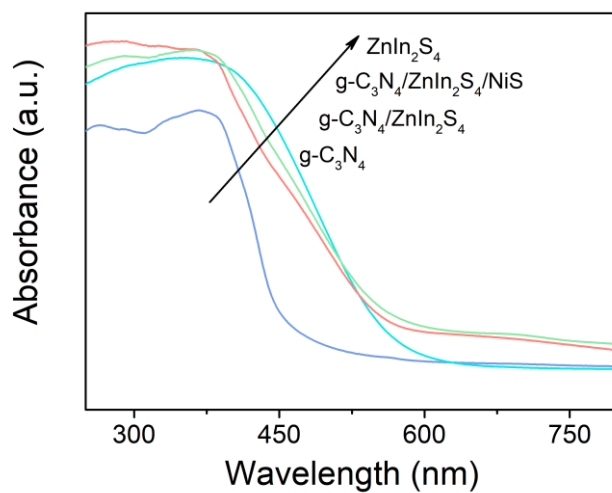

Figure S3. UV-vis DRS of as-prepared products.

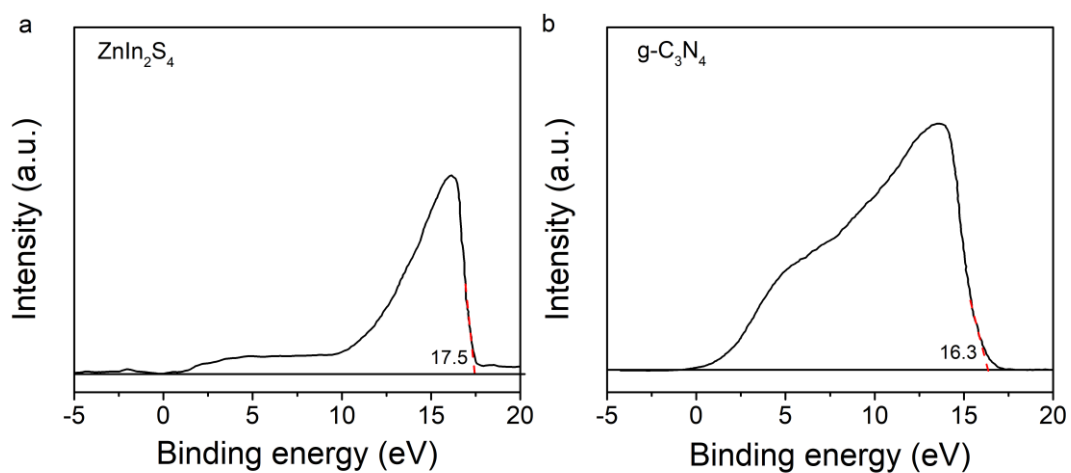

Figure S4. UPS spectra of ZnIn<sub>2</sub>S<sub>4</sub> (a) and g-C<sub>3</sub>N<sub>4</sub> (b).

Table S1. Comparison of the photocatalytic H<sub>2</sub> generation achieved by the g-C<sub>3</sub>N<sub>4</sub>-based photocatalysts.

| Photocatalyst                                                                    | Cocatalyst | Activity ( $\mu\text{mol g}^{-1} \text{h}^{-1}$ ) | Reference        |
|----------------------------------------------------------------------------------|------------|---------------------------------------------------|------------------|
| CCN                                                                              | -          | 758.8                                             | [1]              |
| Cu <sub>3</sub> P/g-C <sub>3</sub> N <sub>4</sub>                                | -          | 808                                               | [2]              |
| WO <sub>3</sub> /g-C <sub>3</sub> N <sub>4</sub>                                 | -          | 982                                               | [3]              |
| MoS <sub>2</sub> /g-C <sub>3</sub> N <sub>4</sub>                                | -          | 1155                                              | [4]              |
| Ba <sub>5</sub> Nb <sub>4</sub> O <sub>15</sub> /g-C <sub>3</sub> N <sub>4</sub> | Pt         | 2673                                              | [5]              |
| GCN-Pt <sub>3</sub> Co                                                           | -          | 2910                                              | [6]              |
| g-C <sub>3</sub> N <sub>4</sub> -AQ-MoO <sub>3</sub>                             | -          | 2999                                              | [7]              |
| CdS/PdAg/g-C <sub>3</sub> N <sub>4</sub>                                         | -          | 3098.3                                            | [8]              |
| ZnIn <sub>2</sub> S <sub>4</sub> @PCN-224                                        | Pt         | 5675                                              | [9]              |
| g-C <sub>3</sub> N <sub>4</sub> /ZnIn <sub>2</sub> S <sub>4</sub> /NiS           | -          | <b>4077.5</b>                                     | <b>This work</b> |

Table S2. Lifetimes of time-resolved fluorescence decays on g-C<sub>3</sub>N<sub>4</sub>, ZnIn<sub>2</sub>S<sub>4</sub>, g-C<sub>3</sub>N<sub>4</sub>/ZnIn<sub>2</sub>S<sub>4</sub> and g-C<sub>3</sub>N<sub>4</sub>/ZnIn<sub>2</sub>S<sub>4</sub>/NiS.

| Sample                                                                 | $\tau_1$ (ns) | $a_1$ (%) | $\tau_2$ (ns) | $a_2$ (%) | $\tau_3$ (ns) | $a_3$ (%) | $\tau_{ave}$ (ns) |
|------------------------------------------------------------------------|---------------|-----------|---------------|-----------|---------------|-----------|-------------------|
| g-C <sub>3</sub> N <sub>4</sub>                                        | 1.00          | 56.00     | 3.42          | 35.52     | 20.00         | 8.49      | 3.47              |
| ZnIn <sub>2</sub> S <sub>4</sub>                                       | 1.24          | 31.23     | 4.11          | 52.67     | 20.90         | 16.10     | 5.92              |
| g-C <sub>3</sub> N <sub>4</sub> /ZnIn <sub>2</sub> S <sub>4</sub>      | 1.30          | 34.43     | 4.59          | 51.93     | 24.19         | 13.65     | 6.13              |
| g-C <sub>3</sub> N <sub>4</sub> /ZnIn <sub>2</sub> S <sub>4</sub> /NiS | 1.26          | 26.99     | 4.48          | 53.50     | 26.97         | 19.51     | 8.00              |

## Reference

- [1] H. Yu, H. Ma, X. Wu, X. Wang, J. Fan and J. Yu, *Sol. RRL*, 2020, 2000372.
- [2] S. Hua, D. Qu, L. An, W. Jiang, Y. Wen, X. Wang and Z. Sun, *Appl. Catal., B*, 2019, **240**, 253-261.
- [3] J. Fu, Q. Xu, J. Low, C. Jiang and J. Yu, *Appl. Catal., B*, 2019, **243**, 556-565.
- [4] Y. Yuan, Z. Shen, S. Wu, Y. Su, L. Pei, Z. Ji, M. Ding, W. Bai, Y. Chen, Z. Yu and Z. Zou, *Appl. Catal., B*, 2019, **246**, 120-128.
- [5] K. Wang, Y. Li, J. Li and G. Zhang, *Appl. Catal., B*, 2020, **263**, 117730.
- [6] H. Cai, B. Wang, L. Xiong, J. Bi, H. Hao, X. Yu, C. Li, J. Liu and S. Yang, *Nano Res.*, 2022, **15**, 1128-1134.
- [7] X. Ma, G. Wang, L. Qin, J. Liu, B. Li, Y. Hu and H. Cheng, *Appl. Catal., B*, 2021, **288**, 120025.
- [8] J. Gao, F. Zhang, H. Xue, L. Zhang, Y. Peng, X. Li, Y. Gao, N. Li and L. Ge, *Appl. Catal., B*, 2021, **281**, 119509.
- [9] P. Jin, L. Wang, X. Ma, R. Lian, J. Huang, H. She, M. Zhang and Q. Wang, *Appl. Catal., B*, 2021, **284**, 119762.
